# Supplementary material for: Development of novel C-nucleoside analogues for the formation of antiparallel-type triplex DNA with duplex DNA that includes TA and dUA base pairs
Source: Royal Society of Chemistry journal article supplement (doi:10.1039/d0ob00420k), 2020-01-01
Supplement: d0ob00420k1.pdf [file d0ob00420k1.pdf]

## Supplementary information

Development of novel *C*-nucleoside analogues for formation of antiparallel-type triplex DNA with duplex DNA that includes TA and dUA base pairs

Yosuke Taniguchi,\* Yuya Magata, Takayuki Osuki, Ryotaro Notomi, Lei Wang, Hidenori Okamura and Shigeki Sasaki\*

Graduate School of Pharmaceutical Sciences, Kyushu University, 3-1-1 Maidashi, Higashi-ku, Fukuoka 812-8582, Japan

E-mail: taniguch@phar.kyushu-u.ac.jp and sasaki@phar.kyushu-u.ac.jp

## Contents

|                                                                             |     |
|-----------------------------------------------------------------------------|-----|
| 1. NMR spectra of new compounds <b>5-8</b> and <b>10-15</b> (Figure S1-S11) | S2  |
| 2. HPLC chart of purification of TFO(3'AZG5') having AY-d(Y-Cl)             | S11 |
| 3. MALDI-TOF-MASS (Negative mode) results of the 18 mer TFOs (Table S1)     | S12 |
| 4. MALDI-TOF-MASS chart of all synthesized TFOs                             | S12 |

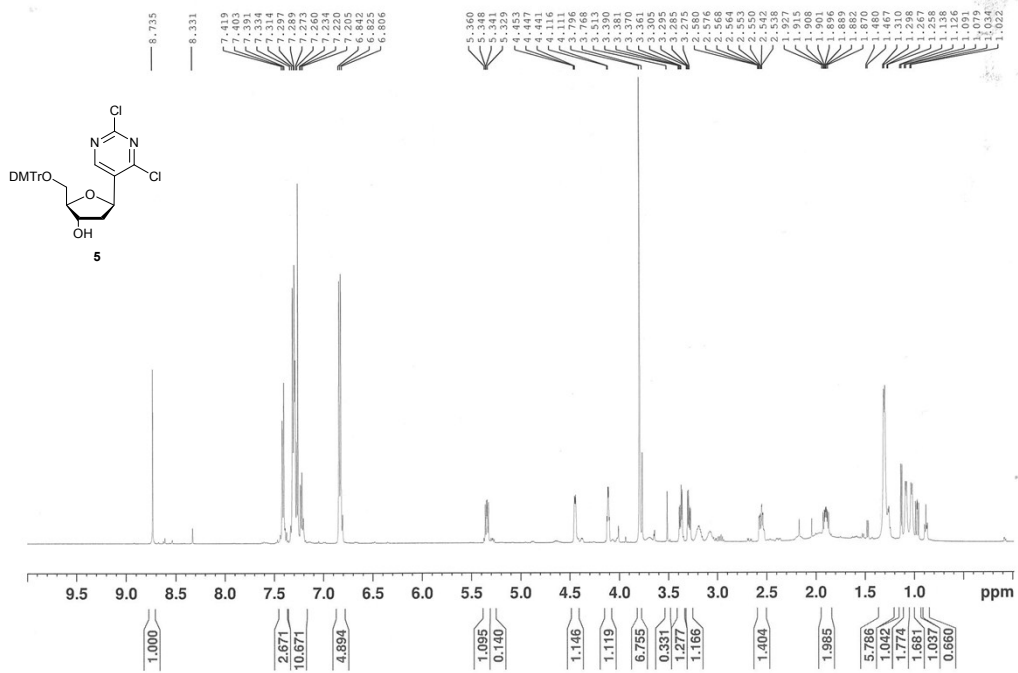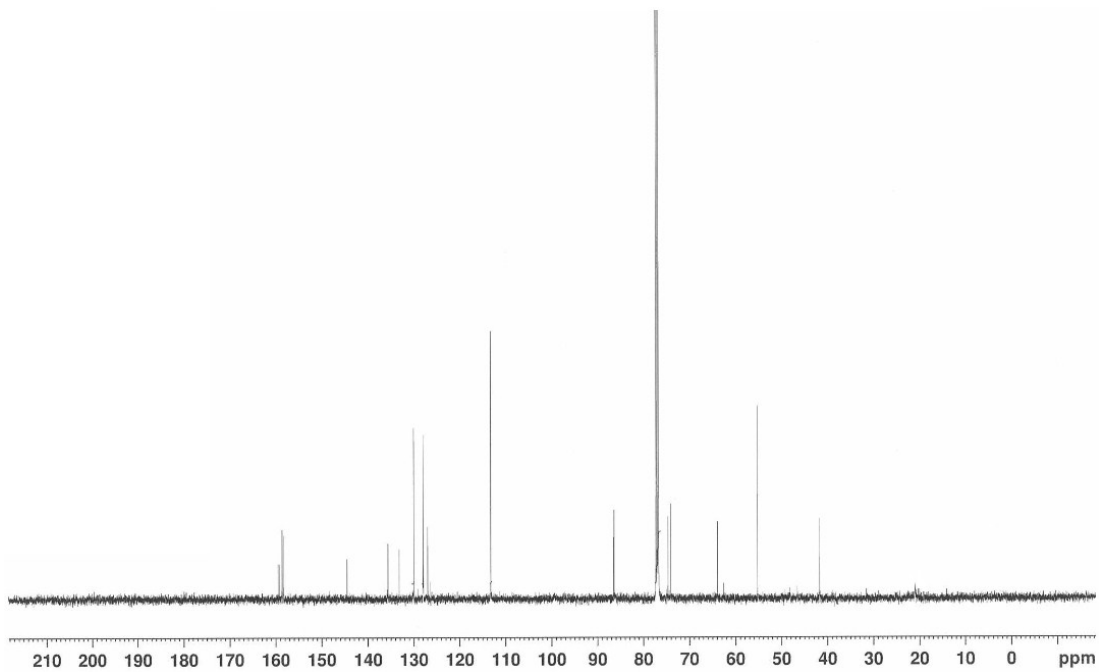

Figure S1. <sup>1</sup>H- and <sup>13</sup>C-NMR spectra of compound **5**.

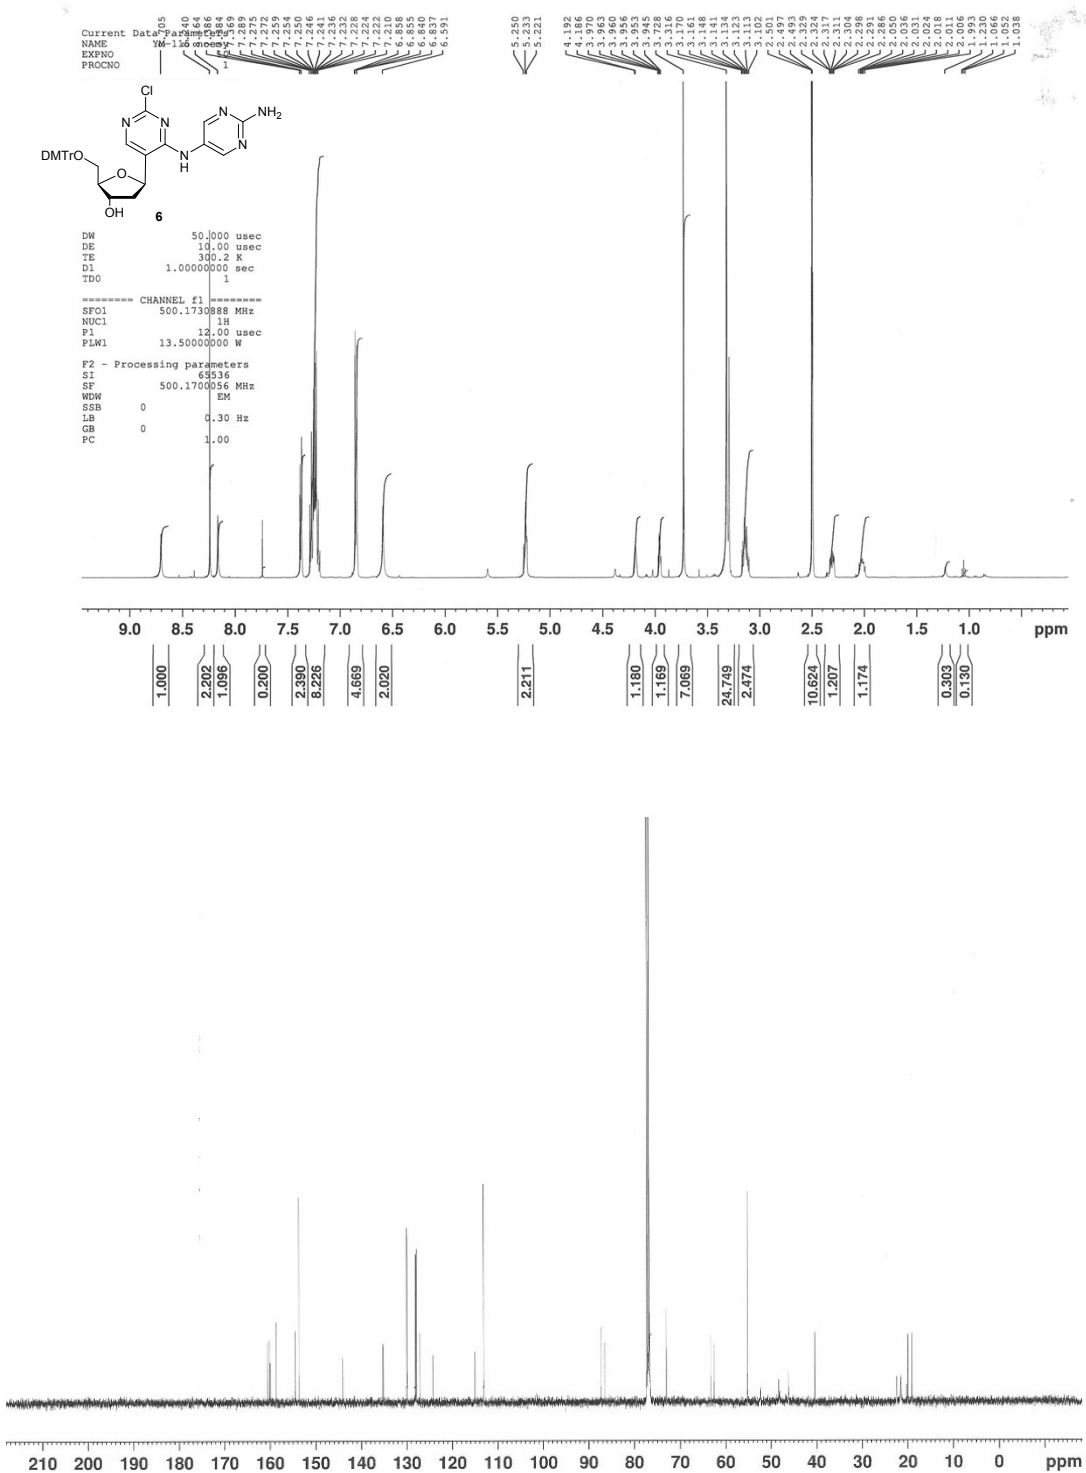

Figure S2. <sup>1</sup>H- and <sup>13</sup>C-NMR spectra of compound 6.

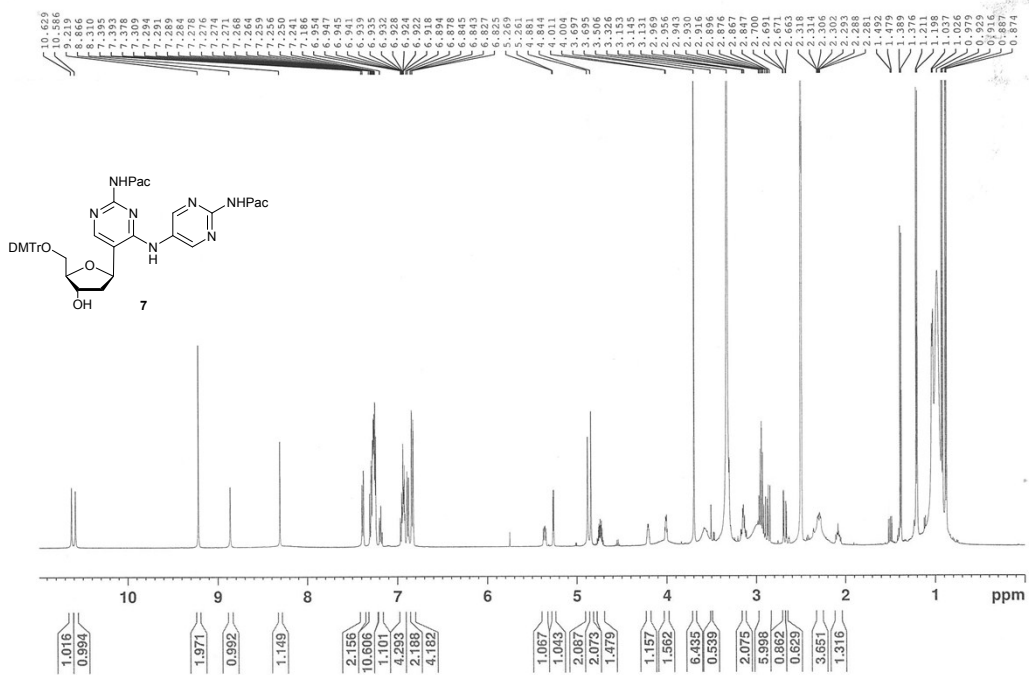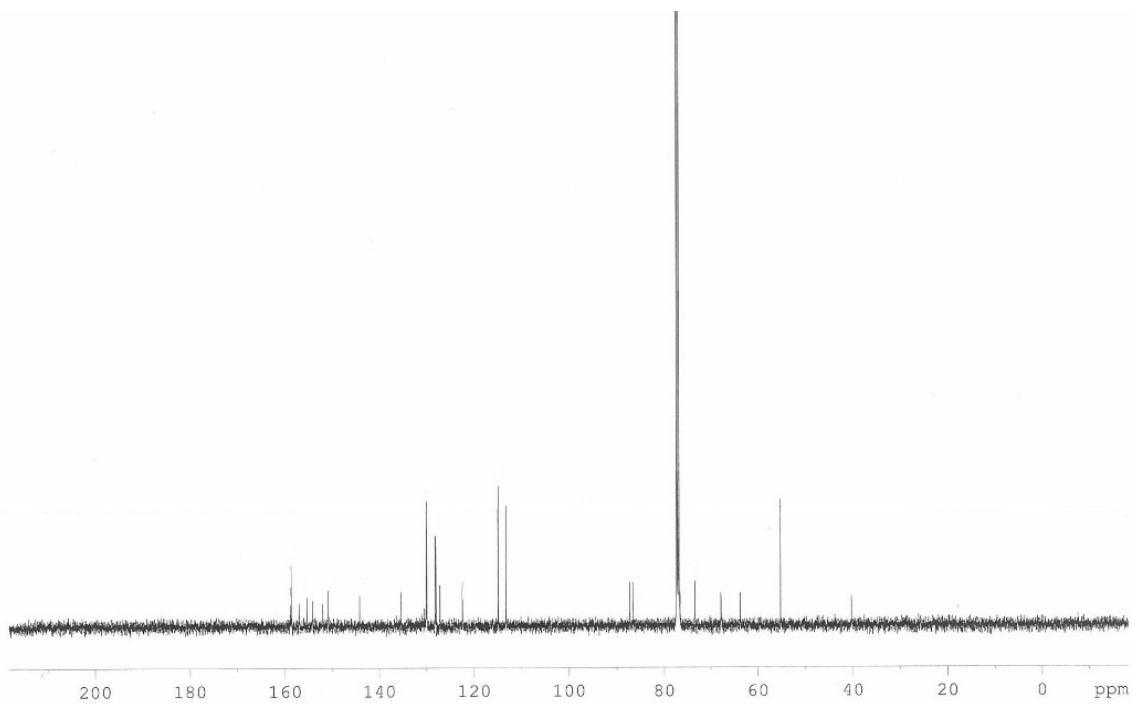

Figure S3. <sup>1</sup>H- and <sup>13</sup>C-NMR spectra of compound 7.

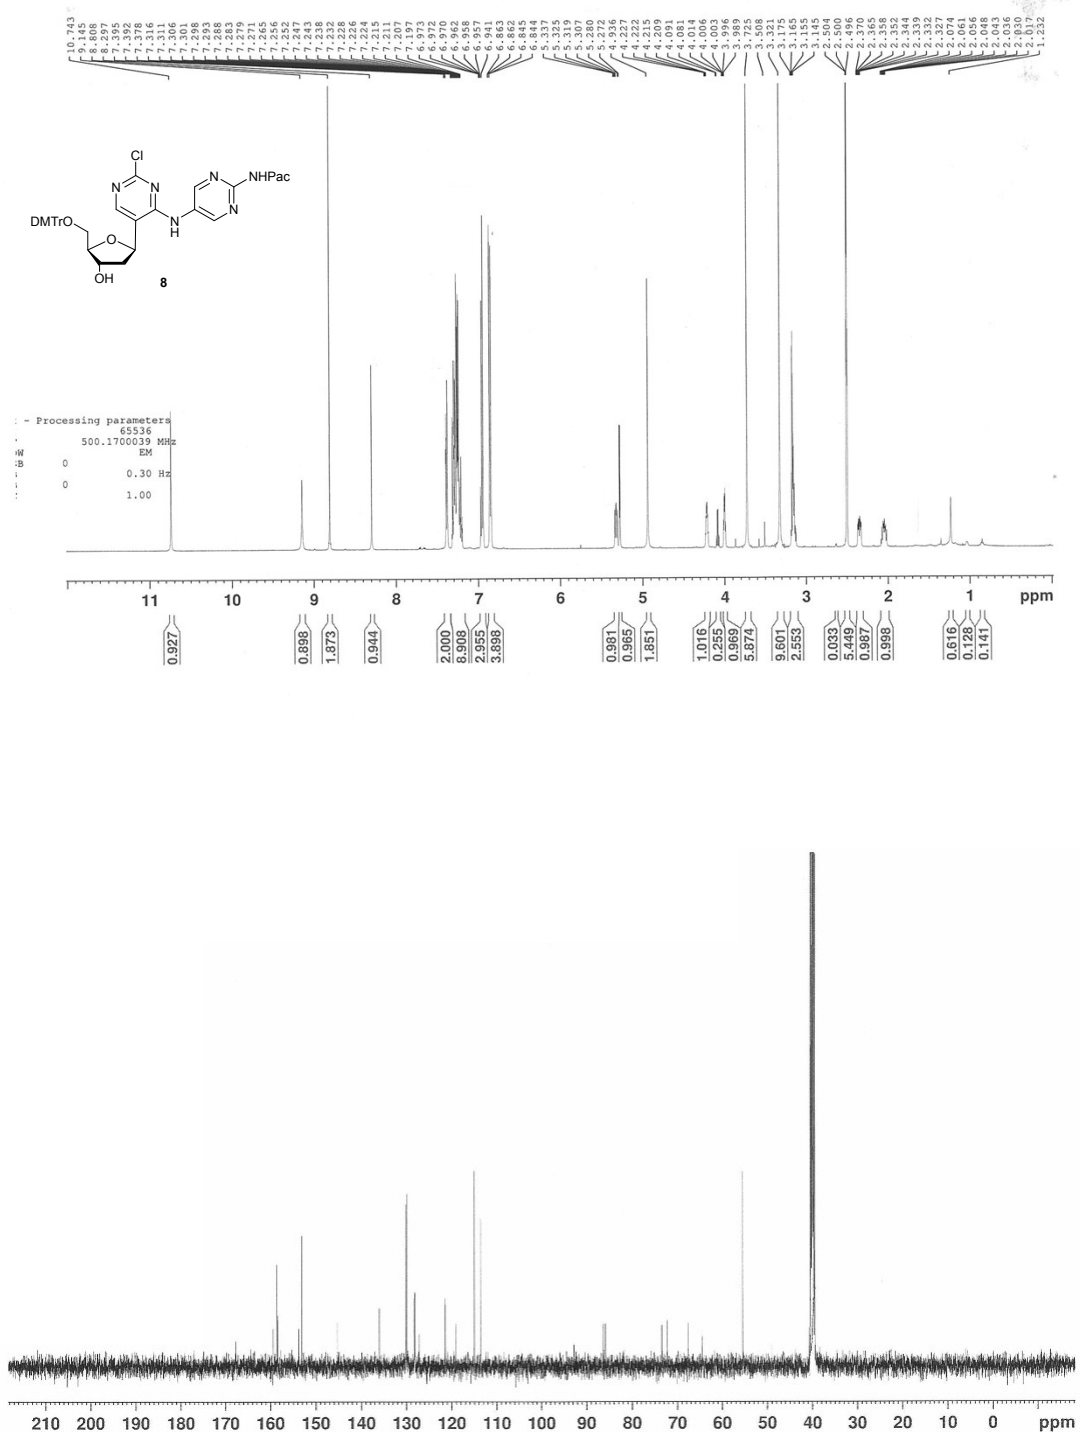

Figure S4. <sup>1</sup>H- and <sup>13</sup>C-NMR spectra of compound **8**.

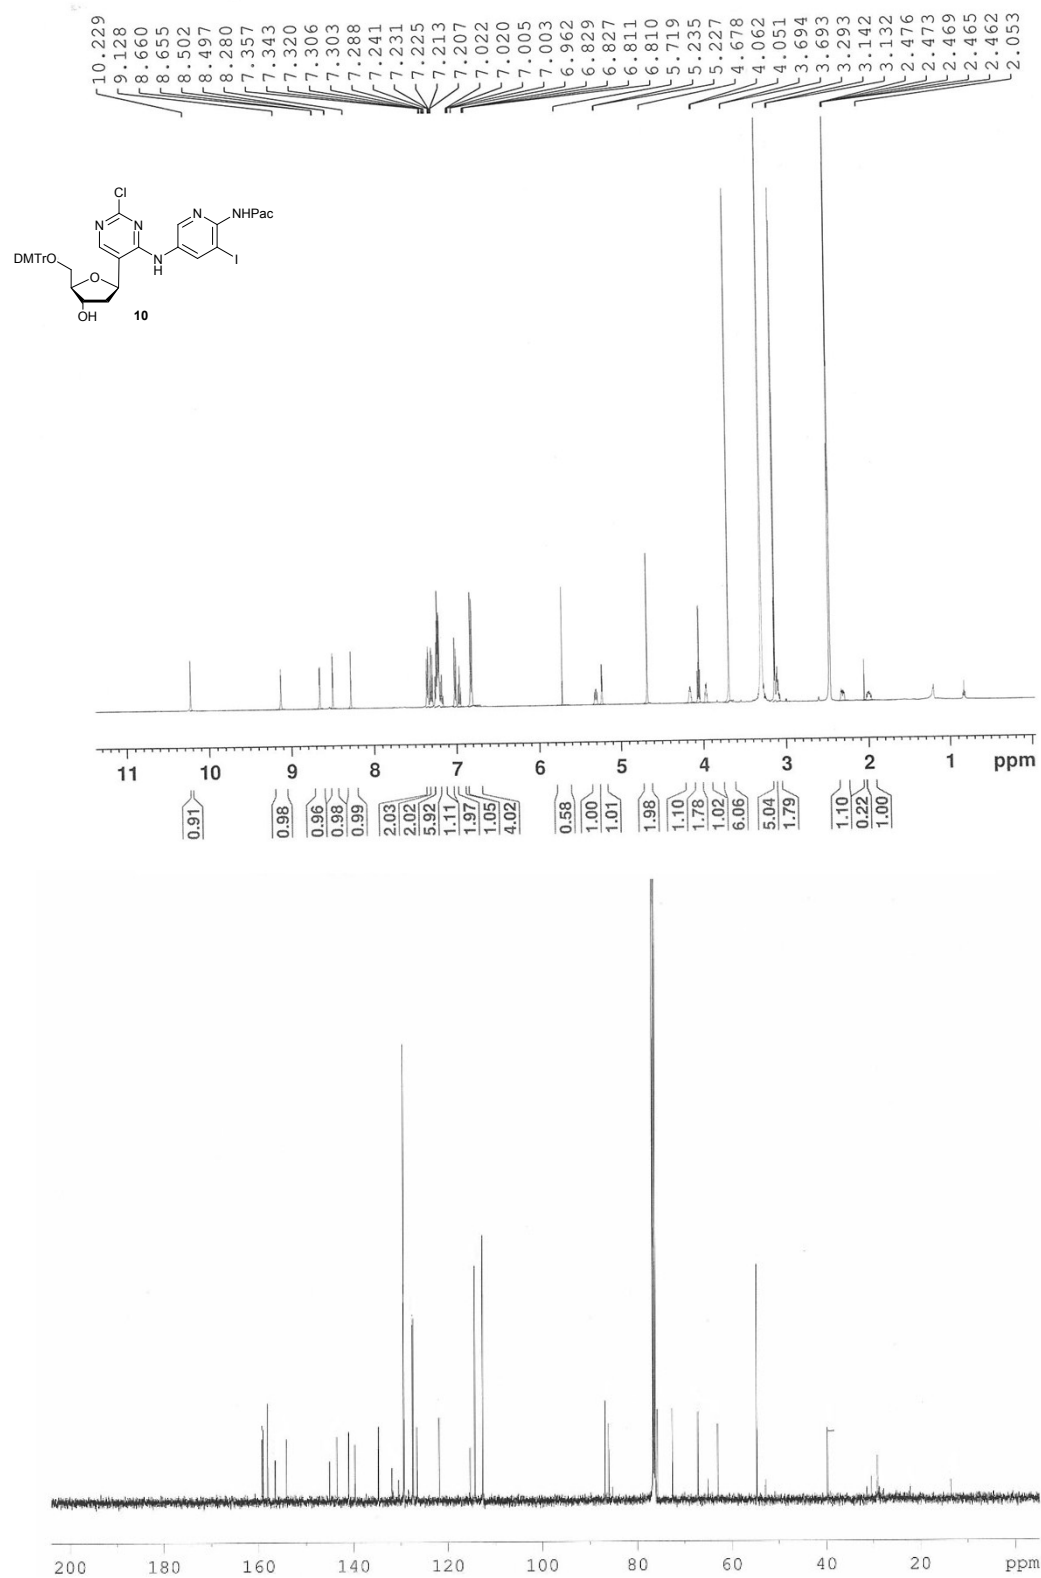

Figure S5. <sup>1</sup>H- and <sup>13</sup>C-NMR spectra of compound **10**.

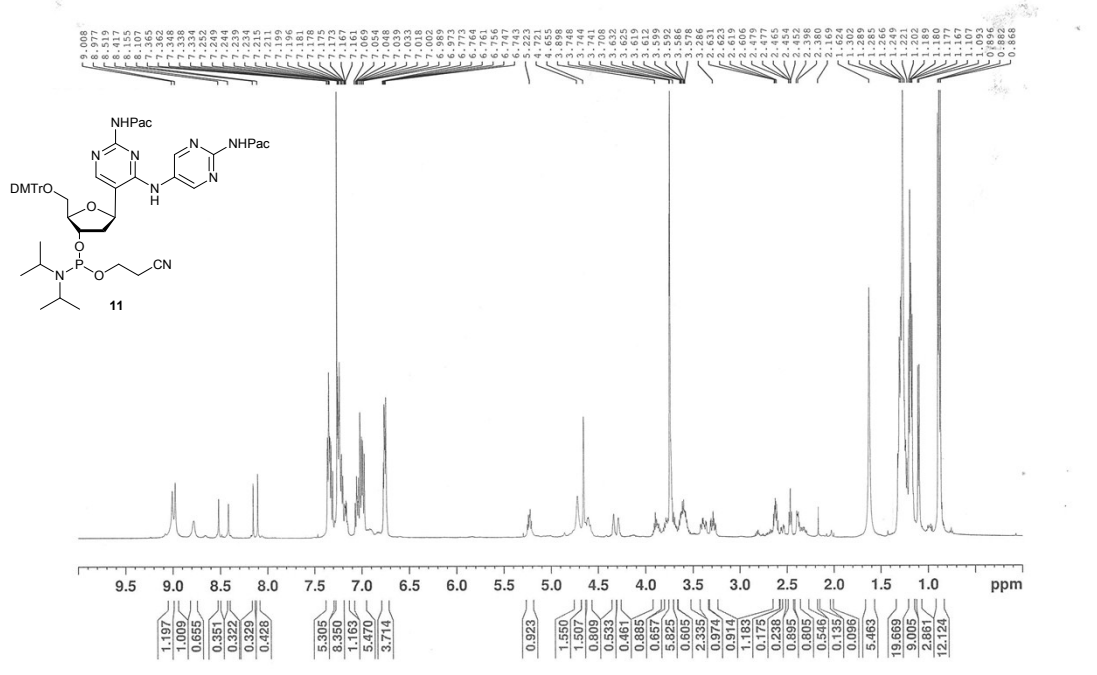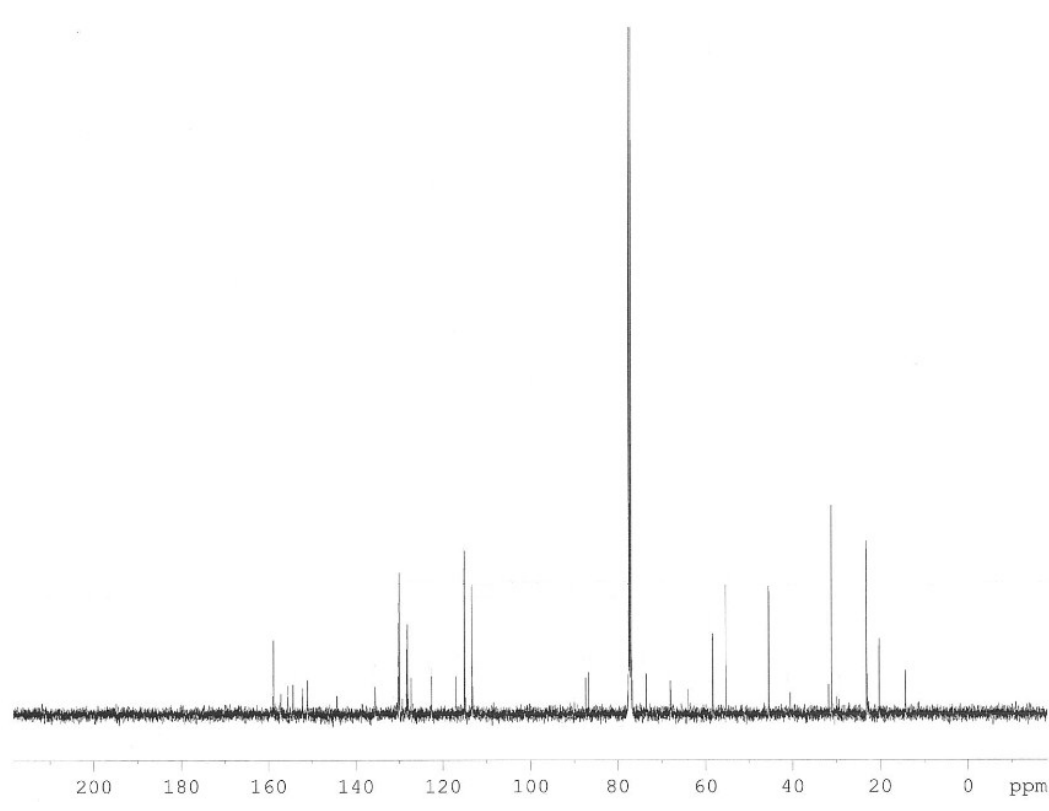

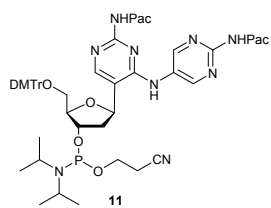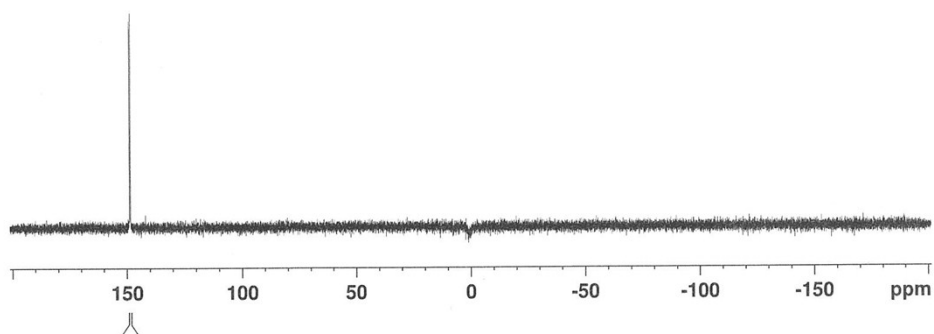

Figure S6.  $^1\text{H}$ -,  $^{13}\text{C}$ - and  $^{31}\text{P}$ -NMR spectra of compound **11**. ( $^{13}\text{C}$  spectrum is not assigned due to the presence of diastereomers.)

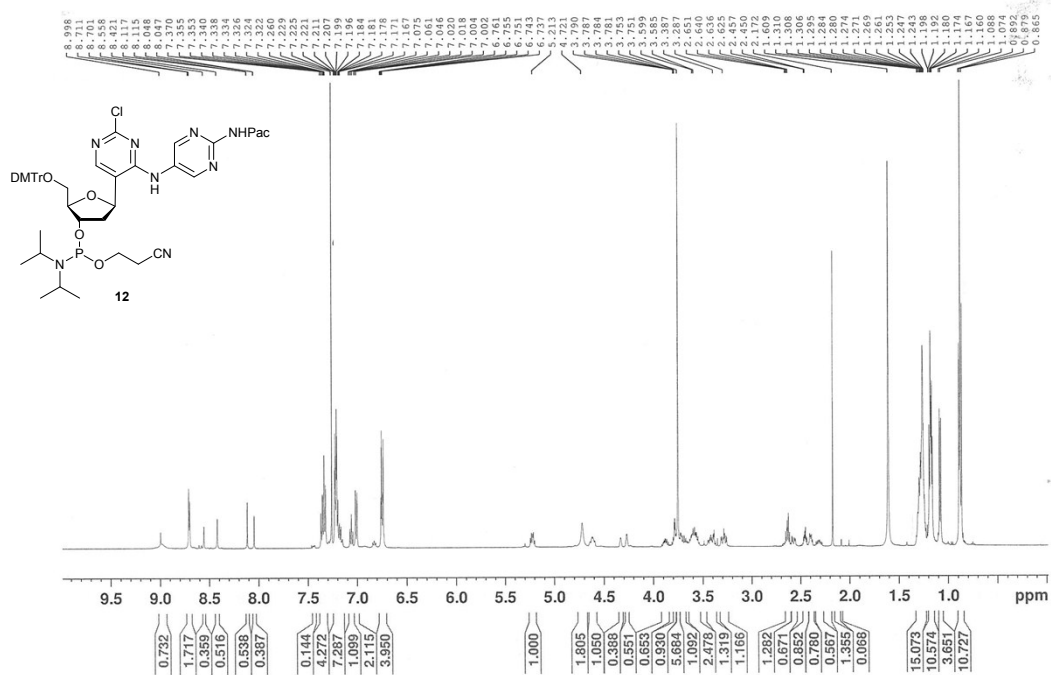



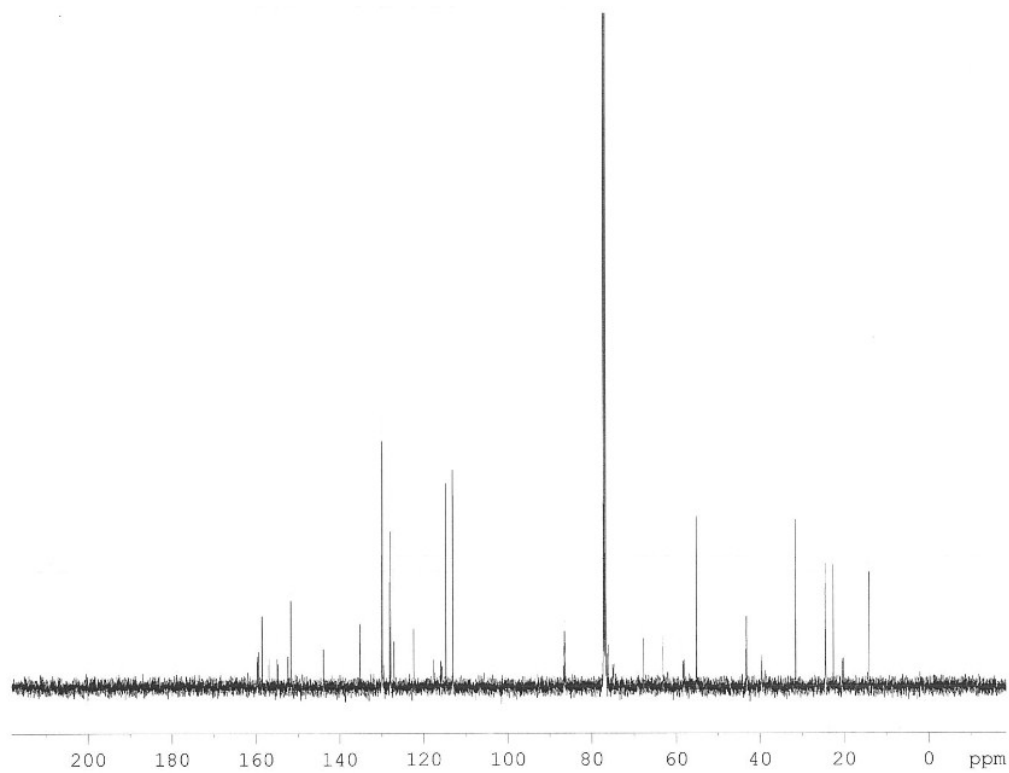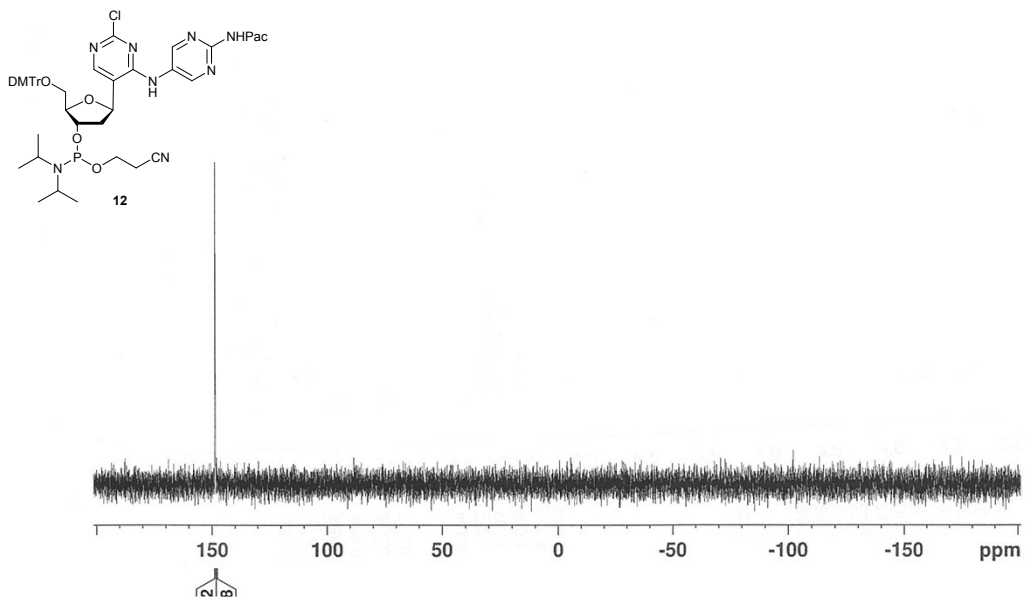

Figure S7.  $^1\text{H}$ -,  $^{13}\text{C}$ - and  $^{31}\text{P}$ -NMR spectra of compound **12**. ( $^{13}\text{C}$  spectrum is not assigned due to the presence of diastereomers.)

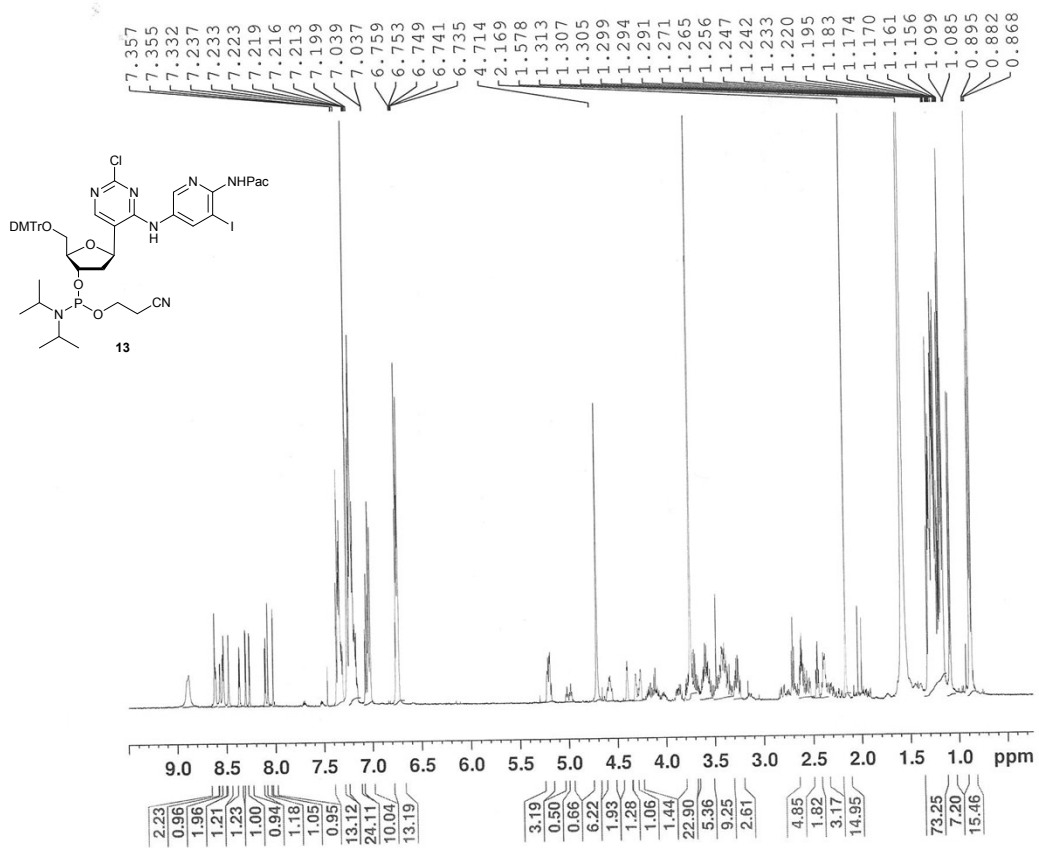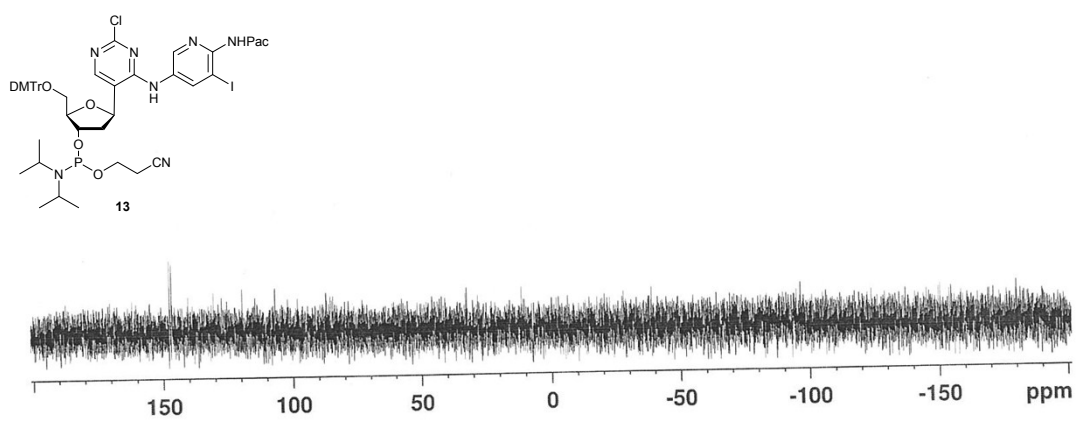

Figure S8. <sup>1</sup>H- and <sup>31</sup>P-NMR spectra of compound **13**. (Due to the low yield of the amidite compound, sufficient amounts could not be used for spectral measurements.)

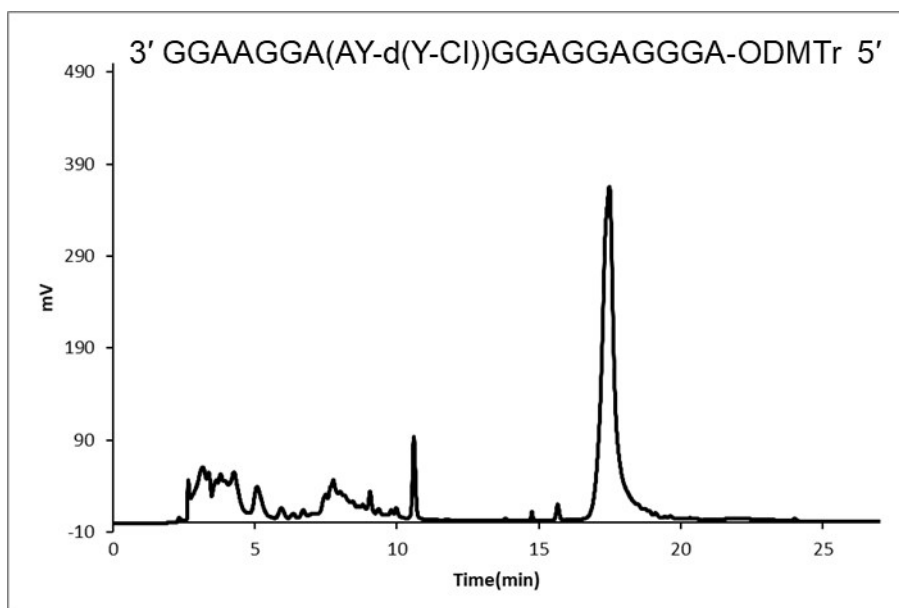

Figure S9. The representative HPLC chart of DMTr-TFO having AY-d(Y-Cl) in the 3'-A and 5'-G sequence.

HPLC conditions: column: Nacalai tesque COSMOSIL 5C18-ARII, 10 × 250 mm, solvents: A: 0.1 M TEAA buffer, B: CH<sub>3</sub>CN, Liner gradient: B for 10% to 40%/20 min, 40 to 100%/27 min, flow rate: 3.0 mL/min, UV: 254 nm, column oven: 35°C. The peak of around 17 min was collected.

Table S1. MALDI-TOF-MASS (Negative mode) results of the 18 mer TFOs containing dY derivatives (Z = AY-d(Y-NH<sub>2</sub>), AY-d(Y-Cl), <sup>1</sup>AP-d(Y-Cl)).

| 3'-GGAAGG NZN' GAGGAGGGA-5' |                             |         |                             |         |
|-----------------------------|-----------------------------|---------|-----------------------------|---------|
| Z                           | 3'-AZG-5'                   |         | 3'-GZG-5'                   |         |
|                             | Calcd.([M-H] <sup>-</sup> ) | Found   | Calcd.([M-H] <sup>-</sup> ) | Found   |
| AY-d(Y-NH <sub>2</sub> )    | 5816.05                     | 5818.28 | 5832.05                     | 5834.99 |
| AY-d(Y-Cl)                  | 5835.00                     | 5836.84 | 5851.00                     | 5851.65 |
| <sup>1</sup> AP-d(Y-Cl)     | 5959.90                     | 5961.76 | 5975.90                     | 5976.05 |
| Z                           | 3'-GZA-5'                   |         | 3'-AZA-5'                   |         |
|                             | Calcd.([M-H] <sup>-</sup> ) | Found   | Calcd.([M-H] <sup>-</sup> ) | Found   |
| AY-d(Y-NH <sub>2</sub> )    | 5816.05                     | 5818.86 | 5800.06                     | 5802.08 |
| AY-d(Y-Cl)                  | 5835.00                     | 5835.61 | 5819.01                     | 5820.63 |
| <sup>1</sup> AP-d(Y-Cl)     | 5959.90                     | 5960.76 | 5943.91                     | 5943.70 |

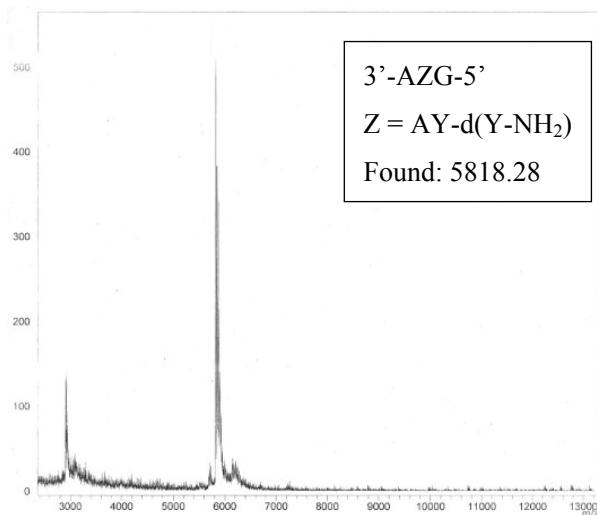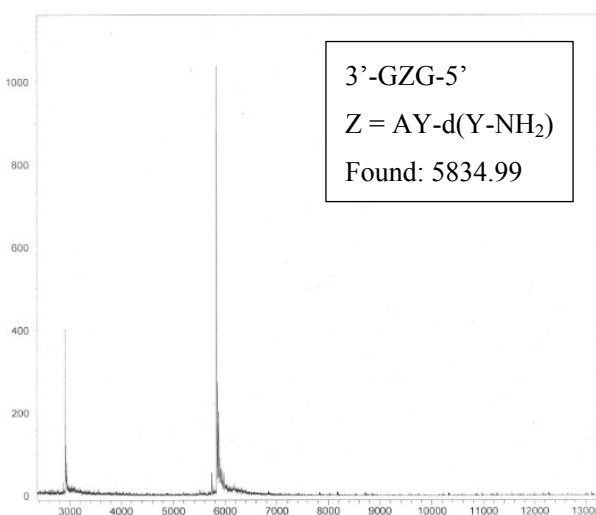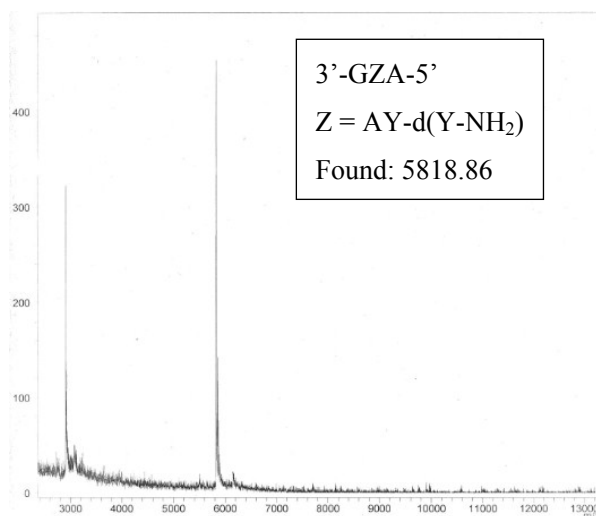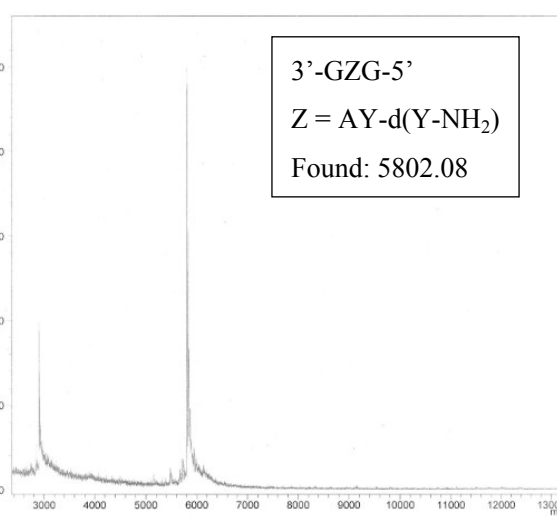

Figure S10 MALDI-TOF MS charts of TFOs containing AY-d(Y-NH<sub>2</sub>)

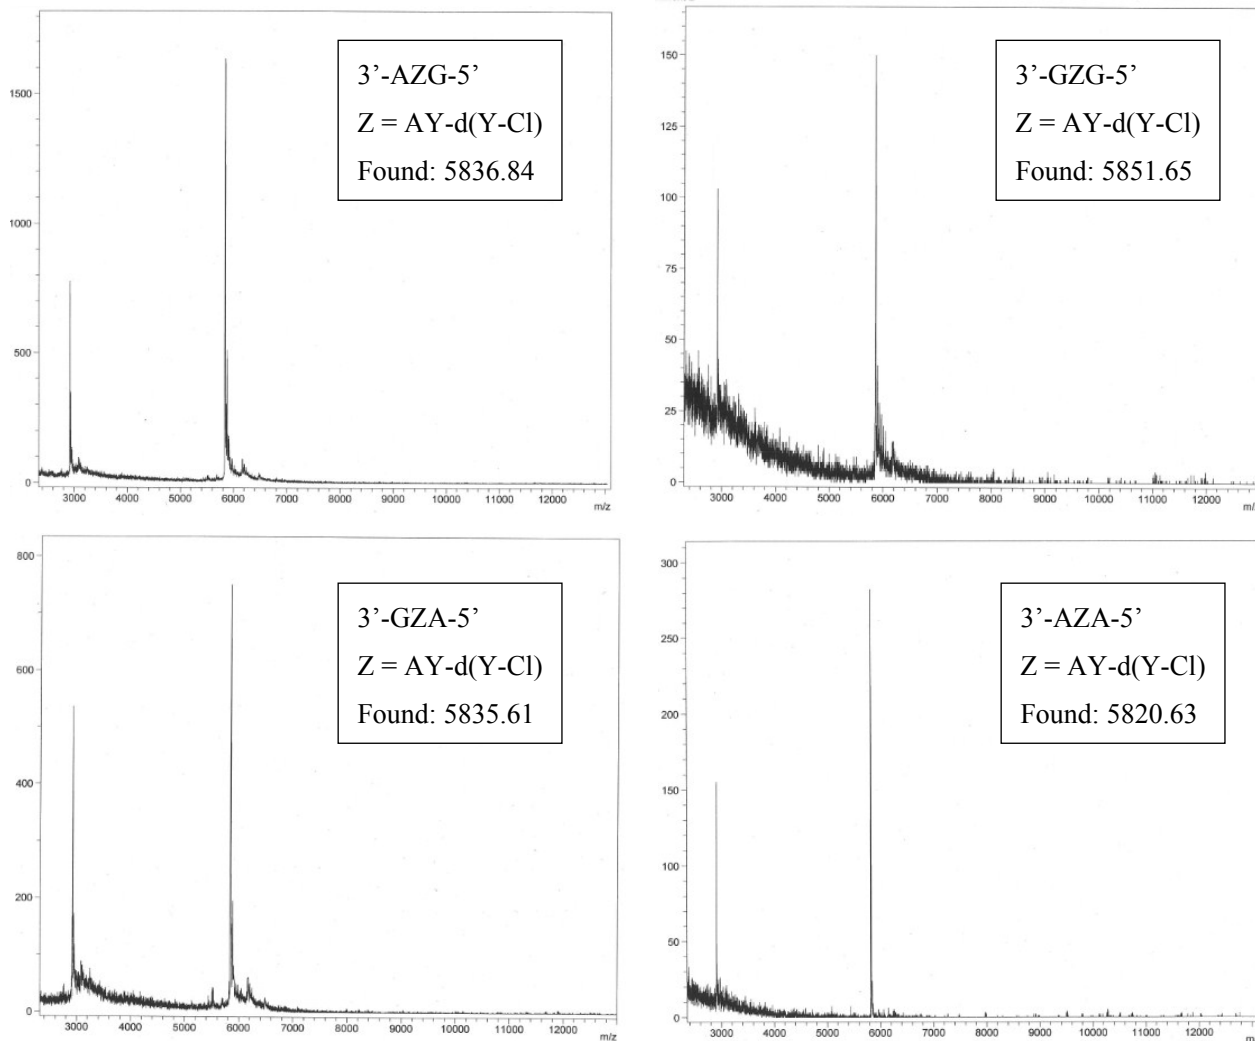

Figure S11 MALDI-TOF MS charts of TFOs containing AY-d(Y-Cl)

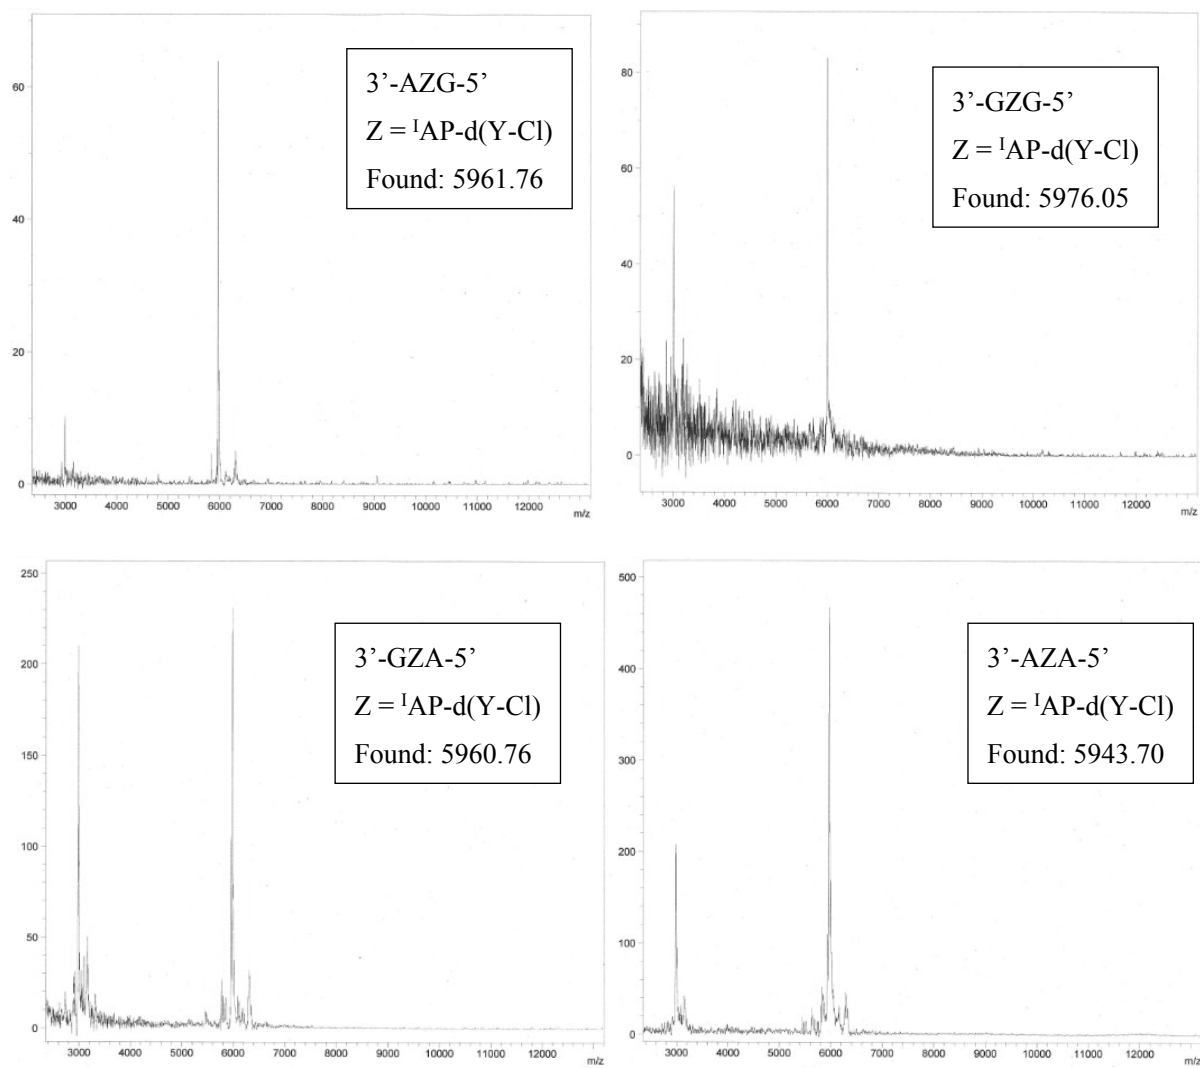

Figure S12 MALDI-TOF MS charts of TFOs containing <sup>1</sup>AP-d(Y-Cl)
